# Supplementary material for: Arthropods and other biota associated with the Azorean trees and shrubs: Laurusazorica (Seub) Franco (Magnoliophyta, Magnoliopsida, Laurales, Lauraceae)
Source: Biodivers Data J. 2022 May 10;10:e80088. doi: 10.3897/BDJ.10.e80088 (PMC9848503; doi:10.3897/BDJ.10.e80088)
Supplement: Supplementary material 3 — Bryophytes- division Marchantiophyta [file bdj-10-e80088-s003.xlsx]

## Sheet: SuppMat_03
Phyllum	Class	Order	Family	Species	Establishment means	IUCN (2020)	Flores	Faial	Pico	São Jorge	Graciosa	Terceira	São Miguel	Santa Maria
Marchantiophyta	Jungermanniopsida	Jungermanniales	Acrobolbaceae	Acrobolbus azoricus (Grolle & Perss.) Briscoe	Azorean Endemic	EN			H			H/L
				Acrobolbus wilsonii Nees	Native	VU			H			H
			Adelanthaceae	Pseudomarsupidium decipiens (Hook.) Grolle	Native	LC			H			H
			Calypogeiaceae	Calypogeia fissa (L.) Raddi	Native	LC			H			H
				Calypogeia muelleriana (Schiffn.) Müll.Frib.	Native	LC						L
				Mnioloma fuscum (Lehm.) R.M.Schust.	Native	VU			H			H/L
			Cephaloziaceae	Fuscocephaloziopsis crassifolia (Lindenb. & Gottsche) Váňa & L.Söderstr.	Native	LC						L
				Nowellia curvifolia (Dicks.) Mitt.	Native	LC			H			H
				Odontoschisma sphagni (Dicks.) Dumort.	Native	LC						H/L
			Geocalycaceae	Geocalyx graveolens (Schrad.) Nees	Native	NT			H			H
			Herbertaceae	Herbertus azoricus (Steph.) P.W.Richards	Native	EN			H			H
			Lepidoziaceae	Bazzania azorica H.Buch & Perss.	Azorean Endemic	EN			H			H/L
				Lepidozia cupressina (Sw.) Lindenb. subsp. cupressina	Native	LC			H			H
				Lepidozia reptans (L.) Dumort.	Native	LC			H			H
				Telaranea azorica (H.Buch & Perss.) Pócs	Macaronesian Endemic	EN			H
				Telaranea europaea J.J.Engel & G.L.Merr.	Native	LC			H			H/L
			Lophocoleaceae	Leptoscyphus porphyrius subsp. azoricus (H.Buch & Perss.) Vanderp. & Heinrichs	Azorean Endemic	EN			H
				Lophocolea bidentata (L.) Dumort.	Native	LC						L		H
				Lophocolea fragrans (Moris & De Not.) Gottsche, Lindenb. & Nees	Native	LC			H/L			H
				Lophocolea heterophylla (Schrad.) Dumort.	Native	LC			H			H
			Plagiochilaceae	Plagiochila bifaria (Sw.) Lindenb.	Native	LC			H			H/L		H
				Plagiochila exigua (Taylor) Taylor	Native	LC			H			H/L
				Plagiochila punctata (Taylor) Taylor	Native	LC			H
			Saccogynaceae	Saccogyna viticulosa (L.) Dumort.	European Endemic	LC			H			H/L
			Scapaniaceae	Diplophyllum albicans (L.) Dumort.	Native	LC						H/L
				Scapania gracilis Lindb.	Native	LC			H			H/L
		Metzgeriales	Aneuraceae	Riccardia latifrons (Lindb.) Lindb.	Native	LC			H
			Metzgeriaceae	Metzgeria furcata (L.) Corda	Native	LC			H/L			H/L	L	H
				Metzgeria leptoneura Spruce	Native	LC			H			H/L
		Porellales	Frullaniaceae	Frullania microphylla (Gottsche) Pearson	European Endemic	LC			H/L	L	H	H/L	L
				Frullania tamarisci (L.) Dumort.	Native	LC			H/L		H	H/L		H
				Frullania teneriffae (F.Weber) Nees	European Endemic	LC			H/L			H/L
			Jubulaceae	Jubula hutchinsiae (Hook.) Dumort. subsp. hutchinsiae	European Endemic	LC			H			H/L
			Lejeuneaceae	Cheilolejeunea cedercreutzii (H.Buch & Perss.) Grolle	Macaronesian Endemic	EN			H
				Cololejeunea azorica V.Allorge & Jovet-Ast	Native	VU			H/L	L		H
				Cololejeunea microscopica (Taylor) Schiffn.	Native	LC			H/L	L		H/L
				Cololejeunea sintenisii (Steph.) Pócs	Native	EN			H/L	L		H/L	L	H
				Colura calyptrifolia (Hook.) Dumort.	Native	LC			H/L			H/L
				Drepanolejeunea hamatifolia (Hook.) Schiffn.	Native	LC			H/L	L		H/L
				Harpalejeunea molleri (Steph.) Grolle	Native	LC			H			H
				Lejeunea eckloniana Lindenb.	Native	LC			H			H		H
				Lejeunea flava subsp. moorei (Lindb.) R.M.Schust.	European Endemic	NT			H			H
				Lejeunea hibernica Bischl., H.A.Mill. & Bonner ex Grolle	European Endemic	NT	H		H			H
				Lejeunea lamacerina (Steph.) Schiffn.	Native	LC			H/L		H	H/L	L	H
				Lejeunea mandonii (Steph.) Müll.Frib.	Native	VU						H		H
				Lejeunea patens Lindb.	Native	LC			H			H/L
				Marchesinia mackaii (Hook.) Gray	European Endemic	LC	H		H/L	L	H	H	L	H
				Microlejeunea ulicina (Taylor) Steph.	Native	LC						H
				Myriocoleopsis minutissima (Sm.) R.L.Zhu, Y.Yu & Pócs	Native	LC			H/L	L	H	H/L
			Porellaceae	Porella canariensis (F.Weber) Underw.	European Endemic	LC			H			H/L
				Porella obtusata (Taylor) Trevis.	Native	LC			H			H
			Radulaceae	Radula aquilegia (Hook.f. & Taylor) Gottsche, Lindenb. & Nees	European Endemic	LC			H			H/L
				Radula carringtonii J.B.Jack	European Endemic	NT	H		H/L			H/L
				Radula complanata (L.) Dumort.	Native	LC			H/L
				Radula holtii Spruce	European Endemic	NT	H		H			L
				Radula nudicaulis Steph.	European Endemic	VU			H
				Radula wichurae Steph.	Macaronesian Endemic	NT	H		H/L			H/L
Taxonomy follows Hodgetts, N. G., Söderström, L., Blockeel, T. L., Caspari, S., Ignatov, M. S., Konstantinova, N. A., ... & Porley, R. D. (2020). An annotated checklist of bryophytes of Europe, Macaronesia and Cyprus. Journal of Bryology, 42(1), 1-116.
H - record from the Cryptogamic Collection of the Herbarium of the University of the Azores (AZU); L - record coming from literature (check Supplementary Material - 17).
Cautionary note: This list does not reflect the complete distribution of liverworts in the different Azorean islands since it was assembled bearing in mind their connection with Laurus azorica.
Tsafack, N., Gabriel, R., Elias, R.B., Boieiro, M., Ferreira, M.T. & Borges, P.A.V. (2022) Arthropods and other Biota associated with the Azorean Trees and Shrubs: Laurus azorica (Seub) Franco. Biodiversity Data Journal.
