# Supplementary material for: Arthropods and other biota associated with the Azorean trees and shrubs: Laurusazorica (Seub) Franco (Magnoliophyta, Magnoliopsida, Laurales, Lauraceae)
Source: Biodivers Data J. 2022 May 10;10:e80088. doi: 10.3897/BDJ.10.e80088 (PMC9848503; doi:10.3897/BDJ.10.e80088)
Supplement: Supplementary material 5 — Lichens - division Ascomycota [file bdj-10-e80088-s005.xlsx]

## Sheet: SuppMat_05
Phylum	Class	Order	Family	Lichen	Flores	Faial	Pico	São Jorge	Graciosa	Terceira	São Miguel
Ascomycota	Arthoniomycetes	Arthoniales	Arthoniaceae	Arthonia stellaris Kremp. 1861						L
	Dothideomycetes	Monoblastiales	Monoblastiaceae	Anisomeridium polypori (Ellis & Everh.) M. E. Barr 1996					L	L
		Pleosporales	Mycoporaceae	Mycoporum lacteum (Ach.) R. C. Harris 1995							L
		Strigulales	Strigulaceae	Strigula fossulicoloides Sérus. 2004						L
		Trypetheliales	Trypetheliaceae	Pseudopyrenula diluta (Fée) Müll. Arg. 1883							L
	Eurotiomycetes	Pyrenulales	Pyrenulaceae	Pyrenula acutispora Kalb & Hafellner 1992						H
				Pyrenula macrospora (Degel.) Coppins & P. James 1980						H
		Verrucariales	Verrucariaceae	Normandina pulchella (Borrer) Nyl. 1861						H/L
	Lecanoromycetes	Caliciales	Caliciaceae	Buellia subdisciformis (Leight.) Vain. 1890						H
			Physciaceae	Leucodermia leucomelos (L.) Kalb 2015						H
		Lecanorales	Pilocarpaceae	Byssoloma subdiscordans (Nyl.) P. James 1971		L				H
				Tapellaria epiphylla (Müll. Arg.) R. Sant. 1952		L
			Ramalinaceae	Bacidia friesiana (Hepp) Körb. 1860							L
				Bacidina apiahica (Müll. Arg.) Vězda 1991			L				L
				Megalaria albocincta (Degel.) Tønsberg 1996						H
				Phyllopsora breviuscula (Nyl.) Müll. Arg. 1894						L
		Ostropales	Coenogoniaceae	Coenogonium pineti (Schrad.) Lücking & Lumbsch 2004						H
			Graphidaceae	Fissurina insidiosa C. Knight & Mitt. 1860							L
				Fissurina triticea (Nyl.) Staiger 2002		L	L			H	L
				Thelotrema lepadinum (Ach.) Ach. 1803							L
			Porinaceae	Pseudosagedia aenea (Wallr.) Hafellner & Kalb 1995							L
		Peltigerales	Collemataceae	Leptogium cyanescens (Ach.) Körb. 1855						H
			Lobariaceae	Lobaria amplissima (Scop.) Forssell 1883		L
				Pseudocyphellaria lacerata Degel. 1941						H/L
				Ricasolia virens (With.) H.H. Blom & Tønsberg 2016						H/L
				Sticta canariensis (Bory) Bory ex Delise 1822						H/L
				Sticta fuliginosa (Dicks.) Ach. 1803						H
			Nephromataceae	Nephroma venosum Degel. 1941		L	L	L			L
			Pannariaceae	Pannaria conoplea (Ach.) Bory 1828			L				L
				Pectenia atlantica (Degel.) P.M. Jørg., L. Lindblom, Wedin & S. Ekman 2014						H
		Pertusariales	Pertusariaceae	Pertusaria leioplaca DC. 1815						L	L
		Teloschistales	Megalosporaceae	Megalospora tuberculosa (Fée) Sipman 1983						H
Cautionary note: This list does not reflect the complete distribution of lichens in the different Azorean islands since it was assembled bearing in mind their connection with Laurus azorica.
H - record from the Cryptogamic Collection of the Herbarium of the University of the Azores (AZU); L - record coming from literature (check Supplementary Material - 17).
Tsafack, N., Gabriel, R., Elias, R.B., Boieiro, M., Ferreira, M.T. & Borges, P.A.V. (2022) Arthropods and other Biota associated with the Azorean Trees and Shrubs: Laurus azorica (Seub) Franco. Biodiversity Data Journal.
